# Supplementary material
Source: Copernicus journal article supplement (doi:10.5194/acp-26-7047-2026)
Supplement: Supplementary file 1 [file acp-26-7047-2026-supplement.pdf]

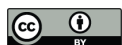

*Supplement of*

**Large ozone enhancement over South Asia triggered by sudden stratospheric warming under westerly QBO phase: implications on ozone radiative forcing**

**Shubhajyoti Roy et al.**

*Correspondence to:* Suvarna Fadnavis ([suvarna@tropmet.res.in](mailto:suvarna@tropmet.res.in))

The copyright of individual parts of the supplement might differ from the article licence.

21  
22  
23  
24  
25  
26  
27  
28  
29  
30  
31  
32  
33  
34  
35  
36  
37  
38  
39  
40  
41  
42  
43  
44  
45  
46  
47  
48  
49

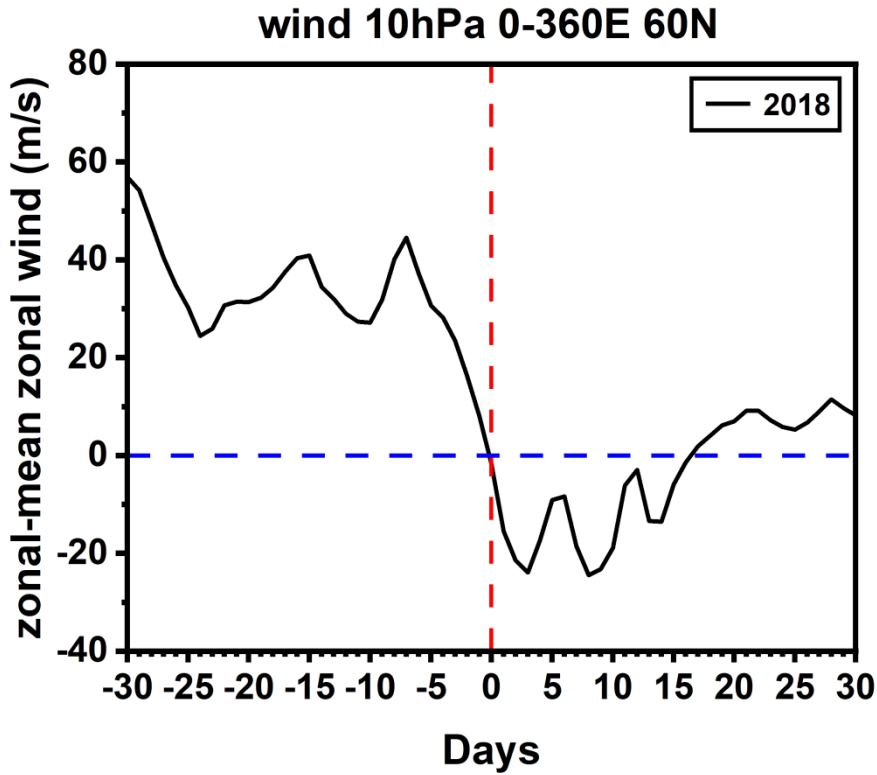

**Figure S1.** Temporal evolutions of the zonal-mean zonal wind at 60° N and 10 hPa, spanning 30 days before and after the onset dates of 2018 SSW event. The vertical red dashed line indicates the onset day of the SSW event (Figure created using the Origin, OriginLab, Northampton, MA)

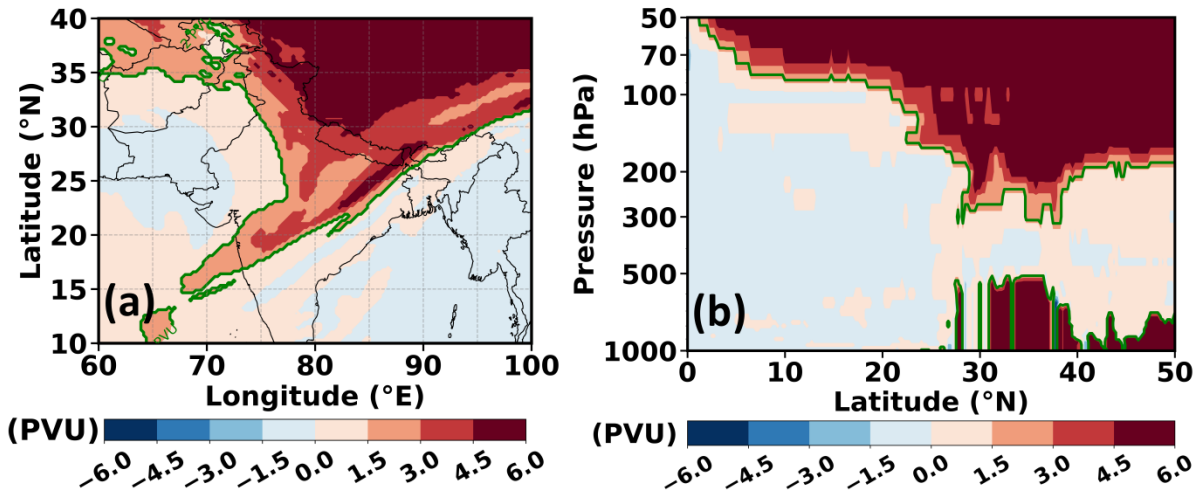

**Figure S2.** Typical example of PV intrusion identified from 2 PVU contours on 14 February 2018. (a) Spatial map of PV at 200 hPa and (b) Pressure-latitude cross-section of PV at 80E.

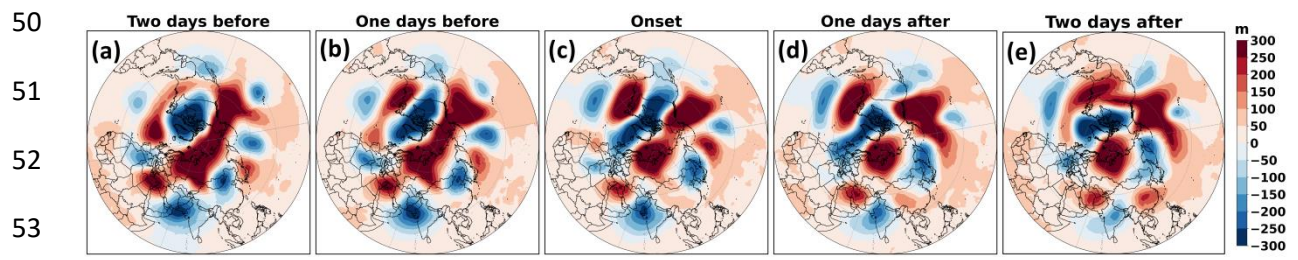

54      **Figure S3.** Spatial map of (a-e) GPH anomaly at 200 hPa from 2 days before to 2 days after  
 55      the onset of the 2018 SSW event.

56

57
